# Supplementary material for: Cellulose particles filled oil-in-water emulsion: a facile strategy to prepare edible oleogels
Source: publisher site journal article supplement (doi:10.1515/ijfe-2024-0236), 2025-01-22
Supplement: Supplementary file 1 [file j_ijfe-2024-0236_suppl_001.docx]

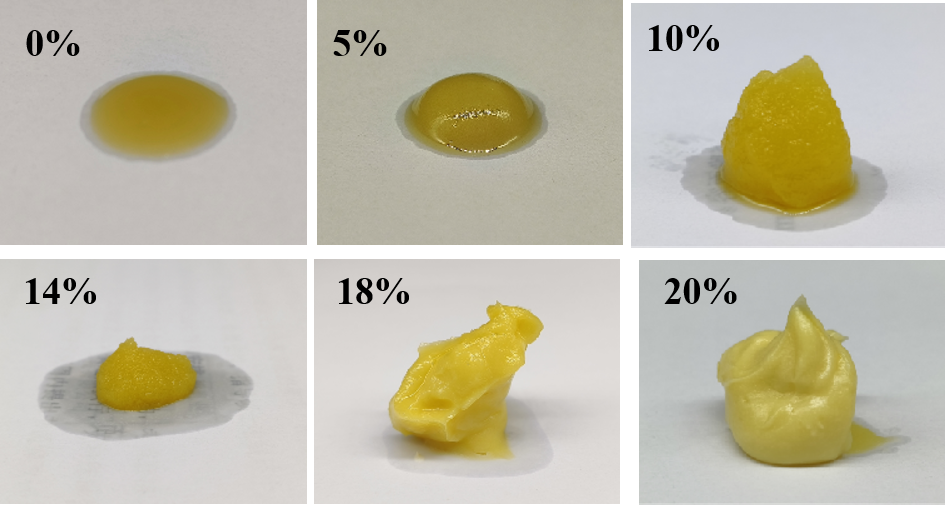


**Figure S1**: Visual appearance of suspension prepared via OPD using various water phase contents at the particle concentration of 30%.
